1 **Title:** Proliferation of superficial neuromasts during lateral line development in the Round Goby,  
2 *Neogobius melanostomus*

3

4 **Authors:** J. M. Dickson<sup>1</sup>, J. A. Janssen<sup>2</sup>

5

6 **Author addresses:**

7 <sup>1</sup> Department of Biological Sciences, University of Wisconsin-Milwaukee, 3209 N. Maryland Ave,  
8 Milwaukee, WI, 53201; E-mail: [jdickson@uwm.edu](mailto:jdickson@uwm.edu)

9 <sup>2</sup> School of Freshwater Sciences, University of Wisconsin-Milwaukee, 600 East Greenfield Ave,  
10 Milwaukee, WI, 53204; E-mail: [jjanssen@uwm.edu](mailto:jjanssen@uwm.edu).

11

12

13 **ABSTRACT:**

14           Members of the family Gobiidae have an unusual lateral line morphology in which some  
15 of the lateral line canal segments do not develop or enclose. This loss of lateral line canal segments  
16 is frequently accompanied by proliferation of superficial neuromasts. Although the proliferation  
17 of superficial neuromasts forms intricate patterns that have been used as a taxonomic tool to  
18 identify individual gobiid species, there has never been a detailed study that has documented the  
19 development of the lateral line system in gobies. The Round Goby, *Neogobius melanostomus*, is  
20 the focus of this study because the absence of the lateral line canal segments below the eye are  
21 accompanied by numerous transverse rows of superficial neuromasts. Our results suggest that the  
22 origin of some of these superficial neuromast lines could be the result of single presumptive canal  
23 neuromasts that have proliferated after canal enclosure is arrested. Many of the intricate patterns  
24 of neuromasts observed in gobiids develop from a simplified pattern of neuromast that is very  
25 similar among different species of gobies. The proliferation of superficial neuromasts has evolved  
26 several times in fish families such as the tetras, gobies, and sculpins, and may provide an adaptive  
27 advantage to ‘tune’ the lateral line system for different environments and prey types.

28 **Key words:** Lake Michigan, Invasive species, DASPEI staining, SEM, reduced canal  
29 morphology, ontogeny.

30

31 **SIGNIFICANCE STATEMENT:**

32 Understanding the development of different lateral line morphologies can provide insights into  
33 how these morphologies have convergently evolved in many fish taxa. This is the first study to  
34 document the progression of the development of the reduced lateral line morphology. This study  
35 shows evidence that the developmental origins of orthogonal lines of superficial neuromasts

36 posterior to the eye are not neomorphic lines, but in fact arise from precursor neuromasts that seem  
37 to be analogous to presumptive canal neuromasts.

## 38 **INTRODUCTION:**

39 Not only do fishes occupy a broad range of habitats, they are extremely diverse and comprise  
40 over 24,000 species (Helfman *et al.*, 1997). Both the environment and phylogenetic histories are  
41 thought to influence the morphology of fish sensory systems such as the lateral line system. The  
42 lateral line system is a mechanosensory system that is used to detect water movement (Denton and  
43 Gray, 1988) that is present in all cyclostomes, fishes, and aquatic amphibians (Yamada, 1973;  
44 Lannoo, 1987a; b; Braun and Northcutt, 1997; Northcutt, 1997). The morphology of the lateral  
45 line system can be quite diverse among fish taxa and amphibians (Webb, 1989; Northcutt, 1997).  
46 It is thought that variations in lateral line canal morphologies have evolved as a result of both  
47 environmental factors (especially in lentic species) and phylogenetic relationships (Webb, 1989;  
48 Northcutt, 1997; Webb and Northcutt, 1997; Fuiman *et al.*, 2004). There are a number of studies  
49 that have tried to place the lateral line morphology in a phylogenetic context (Webb, 1989; Webb  
50 and Northcutt, 1997), however the adult morphology alone is not enough to truly understand the  
51 evolution of the lateral line system.

52 Morphological changes can result from either changes in duration, rate, onset, or offset  
53 (heterochrony) or from changes in the source or patterning of ontogenetic trajectories (Northcutt,  
54 1997). It is possible that even subtle ontogenetic changes in patterning either spatially (heterotopy)  
55 or temporally (heterochrony) during development can result in very different adult phenotypes  
56 (Hall, 1999). By examining the development of the lateral line system in fishes with unusual lateral  
57 line morphologies we may gain insight into how different lateral line morphologies convergently  
58 evolved in several fish taxa.

59 Heterochrony in particular has been suggested to play a role in different lateral line  
60 morphologies (Northcutt, 1997; Webb and Northcutt, 1997). Although most adult fishes have a  
61 combination of superficial neuromasts and canal neuromasts (which are enclosed in a lateral line  
62 canal) (Coombs *et al.*, 1988), both of these sensory organs are present on the surface of the  
63 epithelium early in development (Tarby and Webb, 2003; Webb and Shirey, 2003).  
64 Ontogenetically all neuromasts start in the epidermis above the basement membrane and are  
65 present at or slightly after hatching. It is only later on during development, usually late in the larval  
66 period (Fuiman *et al.*, 2004), that the presumptive canal neuromasts enclose in canals. Northcutt  
67 (1997) described the stages of lateral line development beginning from the initial formation of  
68 ectodermal placodes through the completion of canal enclosure. Northcutt (1997) proposed that in  
69 some taxa the absence of canals or canal segments may be the result of lateral line development  
70 that is arrested before canal enclosure occurs (Northcutt, 1997). This would mean that some  
71 superficial neuromasts are actually homologues of canal neuromasts, which are sometimes referred  
72 to as replacement neuromasts (Northcutt, 1997; Webb and Northcutt, 1997). This is thought to be  
73 the case with some lungfishes and an outgroup analysis suggests that the superficial neuromasts  
74 present in amphibians may also be homologous to canal neuromasts that failed to enclose  
75 (Northcutt, 1997).

76 Although complete canal enclosure is thought to be a synapomorphy for bony fishes, and most  
77 cartilaginous fishes including placoderms, chondrichthyes, and acanthodii, there are taxa within  
78 these groups where there is an apomorphic loss of canal segments. The loss of canal segments in  
79 cranial canals is usually referred to as ‘reduced canal’ morphology. There are a number of fishes  
80 that exhibit the reduced canal morphology (for a review refer to table in Coombs *et al.*, 1988 ),  
81 thus this morphology has convergently involved in numerous fish taxa.

82 A prime example of a family with reduced cranial lateral line canal morphology is Gobiidae,  
83 (Korn and Bennett, 1975; Webb, 1989; Ahnelt *et al.*, 2000; Ahnelt and Duchkowitsch, 2001;  
84 Ahnelt *et al.*, 2004; Bertucci *et al.*, 2012; Langkau *et al.*, 2012). Gobies are an excellent model  
85 organism for evolutionary studies because they are very diverse (over 2000 species) and they  
86 occupy a number of different habitats (Ahnelt and Goschl, 2003). Even within a given geographic  
87 area gobies can occupy a number of different habitats ranging from exposed littoral surfaces to  
88 swiftly running streams. Not only do gobies have a reduced lateral line canal morphology, which  
89 means more of their neuromasts are embedded in the surface of the epidermis (superficial  
90 neuromasts) instead of being enclosed in canals (canal neuromasts), there is also a lot of species  
91 level variation in the patterns of superficial neuromasts present (Toshiaki J, 1971). In fact the  
92 diversity in the gobiid lateral line system is so great that it has been used as a taxonomic tool for  
93 identifying different species of goby (Sanzo, 1911; Ijgin, 1930; Akihito, 1986; Miller, 1986).

94 Even within populations of the same goby species there can be differences in the lateral line  
95 system. Along the west coast of the United States northern populations of the tidewater goby,  
96 *Eucyclogobius newberryi*, have complete canals while more southern populations have greatly  
97 reduced canal types (Ahnelt *et al.*, 2004). Since there is so much variation present in their lateral  
98 line morphology in gobiids, we chose a gobiid species that is locally available, the round goby, as  
99 a starting point to follow the development of the lateral line system in a fish with the reduced  
100 lateral line canal morphology.

101 The round gobies have a reduced canal morphology in which several, but not all, of the cranial  
102 lateral line canals fail to enclose. We hypothesize that the development of canal segments that  
103 completely enclose will be similar to the development that has been reported in other fishes. By  
104 comparing the development of neuromasts where canal segments form with the development of

105 neuromast where canal segments do not form, it will be possible to identify if and where  
106 differences in neuromast development occur. Since presumptive canal neuromasts are often  
107 present early in development, this would provide information on which superficial neuromasts are  
108 most likely canal neuromast homologues (canal segments containing neuromasts are replaced by  
109 lines of superficial neuromasts).

110 This study should provide the foundations for answering broader questions about the  
111 relationship, if any, between neuromast proliferation and canal formation. What happens when a  
112 canal segment is deleted? Do presumptive canal neuromasts that do not enclose in canal segments  
113 behave like superficial neuromasts? Many species with the reduced canal morphology show  
114 neuromast proliferation in areas where canal segments are absent, such as Cobitidae (Lekander,  
115 1949), Gobiidae (Pezold, 1993; Ahnelt *et al.*, 2004), Lophiiformes, and Cyprinodontiformes  
116 (Coombs *et al.*, 1988). We hypothesize that in the round goby the superficial neuromasts in regions  
117 where canal segments are lacking are homologous to canal neuromasts. It is thought that canal  
118 neuromasts do not proliferate after being enclosed in canals, but superficial neuromast proliferation  
119 may still occur during the post-embryonic period (Sato, 1955; Peters, 1973; Puzdrowski, 1989). If  
120 proliferation is a key difference between canal and superficial neuromasts, can stranded canal  
121 homologues regain their ability to proliferate?

## 122 **MATERIALS AND METHODS:**

123 In order to identify developmentally important time points in goby lateral line  
124 development, we sampled Round gobies, *Neogobius melanostomus*, from nests collected from  
125 Lake Michigan (see 16a). We sampled specimens 6-74 mm SL. Lateral line development was  
126 assessed in live fish using DASPEI staining and fish previously prepped for SEM to determine  
127 when morphological changes occurred.

128 **Animals:** SCUBA divers collected goby egg nests attached to rocks from Lake Michigan. Nests  
129 were transported back to the Great Lakes WATER Institute in coolers during the summer of 2011.  
130 After about two weeks, the larvae were moved into large conical tanks. And either fed zooplankton  
131 collected from Lake Michigan, daphnia, or cultured *Artemia* nauplii and adults. Larger juveniles  
132 (36-61mm SL) were collected using a seine net.

133 **DASPEI:** Fish were incubated in a 0.01% DASPEI (2-(4-(dimethylamino)styryl) -N-  
134 ethylpyridinium iodide, Invitrogen, Carlsbad, CA) in Danieau buffer (trace salt solution buffered  
135 with HEPES (pH 7.6)) used to raise zebrafish embryos/larvae for 30 min. to an 1 hour. DASPEI  
136 is a vital stain that stains the mitochondria in the hair cells of the lateral line neuromasts. Gobies  
137 were then anesthetized in 0.1% Tricaine methanesulfonate (MS-222) in 1X Danieau buffer. Fish  
138 were placed on a Petri dish before they were viewed with a Leica MS75 microscope with a blue  
139 laser to excite the DASPEI staining. Images were taken using a Nikon coolpix 8800 camera  
140 attached to the ocular. After, the larvae were either fixed in 10% formalin or in Karnovsky's  
141 fixative for SEM. DASPEI staining was used to monitor the development of the lateral line system,  
142 which facilitated a more precise sampling schedule.

143 **Scanning Electron Microscopy:** A size series of gobies ranging from 6 mm-38 mm SL  
144 were preserved in Karnovsky's fixative (2% paraformaldehyde and 2.5% glutaraldehyde in 0.1M  
145 cacodylate buffer pH 7.4). They were kept at room temperature for several days to facilitate  
146 penetration of the fixative and afterwards stored at 4°C. Before they were dehydrated they were  
147 rinsed in distilled water. Fish larger than 14 mm SL were cut into sections before they were  
148 immersed in 1% osmium tetroxide for 1 hour (Janssen *et al.*, 1987) and dehydrated in a graded  
149 ethanol series (50%, 70%, 95%, 100%, 100%) for thirty min for each step (Ahnelt and Bohacek,

150 2004). Samples were placed in an ultrasonic bath for 2 min in 70% ethanol to remove the cupula  
151 (Maruska and Tricas, 2004) and critical point dried. They were mounted on an aluminum stub.  
152 Samples were then sputter coated with an Emitech K575X sputter coater with either 10 nm iridium  
153 or gold coated palladium. They were then viewed on a Hitachi S-4800 FE SEM using the Quartz  
154 PCI program. Plates were assembled in photoshop and any measurements taken were done in  
155 ImageJ.

156 **Lateral line system descriptions:** For sake of consistency with other gobiid studies the  
157 nomenclature used to described the lateral line canals and superficial neuromast lines in the round  
158 goby was based on the previous descriptions of the gobiid lateral line system (Ahnelt and  
159 Duchkowitsch, 2001; Ahnelt and Goschl, 2003; Ahnelt *et al.*, 2004). This nomenclature may differ  
160 from the terms used to describe the lateral lines in other species. For instance, the oculoscapular  
161 canal which is referred to in gobiid literature is commonly described as several different canals  
162 (such as supraorbital, otic, preopercular canals) in other fish species. ANCOVA statistical analyses  
163 were carried out with either 'R' or JMP Pro 13.

164



165 **RESULTS:**

166 Neuromast identification is based on Ahnelt papers (Sanzo, 1911; Miller, 1986; Ahnelt *et*  
167 *al.*, 2000; Ahnelt and Duchkowitsch, 2001; Ahnelt and Goschl, 2003; Ahnelt and Bohacek, 2004;  
168 Ahnelt *et al.*, 2004) (Fig.1). There appears to be a proliferation of neuromasts in gobiids, especially  
169 in the regions where canal segments are missing (infraorbital, certain oculoscapular segments, and  
170 the supratemporal region). These lines of superficial neuromasts were divided into four major  
171 regions such as the mandibular, otic, preopercular, and dorsal regions and are described below.  
172 These regions are similar to what has been described in adults in the goby literature, but they do  
173 not necessarily reflect the innervation or the developmental origins of specific neuromast lines.

174 We observed that the number of neuromasts in all the major regions of the round goby  
175 significantly increase with fish size during early embryonic development (Figs. 2-6) and is  
176 described in detail below:

177 *Preorbital (snout):*

178 On the anterior portion of the head (snout), there are a median series lines (*r*, and *s* in other  
179 gobies). At 9 mm standard length (SL) there were four neuromasts, and by 35 mm SL each of these  
180 four neuromast have proliferated into rows containing 3-4 neuromasts (Fig. 2). The two median  
181 rows are tangential, and the outer dorsal and ventral rows are longitudinal. The lateral series is  
182 comprised of indistinct rows belonging to *c*.

183 *Interorbital:*

184 Supraorbital canals are present, so it appears that there are no inter-orbital papillae, *p*,  
185 present between the eyes (Fig. 6).

186 *Suborbital (infraorbital region below eye):*

187       There are two rows of longitudinal neuromasts *b*, and *d* that increase in number throughout  
188 the early larval development. These rows are visible in the smallest fish examined 6 mm SL. At  
189 this time *b* contains ~2 neuromasts and *d*=11 neuromasts. In the largest fish examined 74 mm SL,  
190 there were 18-26 neuromasts in *b* and 66 neuromasts in *d*. There are typically 7 transverse  
191 (orthogonal) rows that form from neuromasts in the longitudinal row *a*. In a few individuals there  
192 is an extra row of neuromasts between lines *a*4 and *a*5 giving them a total of 8 transverse rows  
193 (ex: 58 mm SL individual). Two of these lines (*a*5, *a*6) are broken by the longitudinal line *b* and  
194 are thus divided into superior (*a*5s, *a*6s) and inferior (*a*5i, *a*6i). Line *a*6i can also be referred to as  
195 *cp*. These seven transverse lines are represented by a single neuromast in the smallest fish  
196 examined, 6 mm SL. At 11-12 mm SL neuromasts in these lines begin to proliferate and smaller  
197 neuromasts can be seen above and/or below the larger neuromasts that were initially present. There  
198 is an increase in the number of superficial neuromasts with fish size. By 74 mm SL there are up to  
199 27 neuromasts in line *a*1, 12 neuromasts in line *a*2, 14 neuromasts in line *a*3, 10 neuromasts in line  
200 *a*5s, 5 neuromasts in line *a*5i, 6 neuromasts in line *a*6s, 12 neuromasts in line *a*6i, 3 neuromasts in  
201 line *a*7 (Fig. 1, 3). ANCOVAs were run on the transverse lines of the subocular region indicate  
202 that there is a significant increase ( $p<0.5$ ) in lines 1,4,5i,5s, 6i, and 6s (Fig. 5).

203 *Preopercular-mandibular:*

204       There are three longitudinal rows. Row *e* is on the lateral edge of the lower jaw and the  
205 preoperculum. This line is broken up into two lines, the mandibular line *e*<sup>1</sup> and the preopercular  
206 line *e*<sup>2</sup>. The medial row (*i*) is also broken up into a mandibular line, *i*<sup>1</sup>, and a preopercular line *i*<sup>2</sup>.  
207 At 6 mm SL there are 7 neuromasts in each of these rows, in larger individuals 35-75 mm SL there  
208 can be between 25-35 neuromast present in *i*<sup>1</sup> and up to 45 neuromasts in *i*<sup>2</sup>. There is also a medial

209 row called *f*, which initially appears as a longitudinal line but by 38 mm SL *f* is more a triangular  
210 shaped cluster of neuromasts (Fig.3).

211 *Oculoscapular (Supraorbital/otic region):*

212 There are transverse lines (*z*, *u*<sup>1</sup>, *u*<sup>2</sup>, *u*<sup>3</sup>, *u*<sup>4</sup>, *as*<sup>1-3</sup>) and longitudinal rows (*x*<sup>1</sup>, *x*<sup>2</sup>, *la*<sup>1-3</sup>). Row *z* is  
213 anterior and dorsal to the preopercular pore M. Initially, there are large neuromasts in what appears  
214 to be lines similar to longitudinal superficial neuromast lines *u*. These individual neuromasts  
215 proliferate to become three transverse lines ventral to *x*<sup>1</sup>. There is a second *x*<sup>2</sup> line that is posterior  
216 to canal segment K-L (Fig. 3).

217 *Opercular:*

218 There is a transverse row (*ot*) and two longitudinal rows, (*os*, *oi*). The *ot* has neuromasts ranging  
219 from 6 (6 mm SL) to 45 (74 mm SL). In the two longitudinal rows, *os* ranges from 2-21 (6-74 mm  
220 SL) whereas *oi* ranges from 4-18 (6-74 mm SL). In general, there does seem to be an increase in  
221 neuromast number within each row with size (Fig. 3).

222 *Anterior dorsal (occipital):*

223 There are two transverse lines (*n*, *o*) and two longitudinal lines (*g*, *m*, *h*). The two transverse  
224 lines are more anterior than the other longitudinal rows. Row *n* is just posterior to the pore E, and  
225 *o* just anterior to the two longitudinal rows *g* (more medial) and *m* more lateral. Initially there is  
226 one neuromast present in each of these lines as early as 9 mm SL. By 74 mm SL there are up to  
227 ten neuromasts in the *n*, 13 in line *m*, and nine in row *g*. The superficial neuromast line *h* is located  
228 just posterior to the dorsal fin and is divided into two sections. Although *h* was only examined in  
229 four individuals, the number of neuromasts within these lines does seem to increase with age. At  
230 14 mm SL there are three neuromasts in the anterior *h* line and four neuromasts in the posterior *h*

231 line. The amount of neuromasts in these lines in a 35 mm SL individual was eight and six  
232 respectively (Fig. 6).

### 233 Cranial canals:

234 The pores for the supraorbital region of the oculoscapular canal B, C, D, E, F and pores F,  
235 G, H, K, L from the otic region are present on the oculoscapular. There is a fused pore C between  
236 the right and left canal segments. This means there are four canal segments in the supraorbital  
237 region, and three canal segments in the otic region. There are two canal segments in the  
238 preopercular region (M, N, O pores). By 5.5 mm SL there are grooves and ectodermal ridges  
239 beginning to form in the supraorbital and otic regions of the oculoscapular canal. By 6.5 mm SL  
240 some segments in the SO region of the oculoscapular canal are completely enclosed and the  
241 ectodermal ridges are present in the middle segment (G-H) of the otic region of the oculoscapular  
242 canal. There is some variation in the timing of canals enclosure, but by 27 mm SL all canal  
243 segments seem to be enclosed.

244 The anterior oculoscapular canal segments (in the supraorbital region) appears to enclose first  
245 (around 9 mm SL), followed by the posterior regions (enclosed by ~12 mm SL). The otic region  
246 has the anterior most segments enclosed by ~12 mm SL and posterior segments completely  
247 enclosed by 14 mm SL, and the preopercular region has one segment enclosed by ~12mm SL and  
248 complete enclosure can occur as early as 14.5 mm SL, however there were fish 16 mm SL that  
249 only had one preopercular segment enclosed. In the round goby complete canal enclosure occurs  
250 in many of the segments of the oculoscapular canal by 27 mm SL. In the preopercular region of  
251 the oculoscapular canal there is variation in which canal segments begin to enclose first. Most fish  
252 examined had the ventral region enclosing first, but there was one 14mm SL individual that had  
253 the dorsal region enclosed first. In the otic region of the oculoscapular canal it appears that the

254 anterior segment (12 mm SL) encloses first followed by the anterior segment and then the posterior  
255 most segment (14.5 mm SL).

### 256 Trunk:

257 Individual neuromasts along the mid-line (*lm*) of the trunk are visible in SEM prepped  
258 individuals at 6 mm SL before scales have begun to form. Scales are present by 9 mm SL. By 10  
259 mm SL clusters of two neuromasts are common along the midline of the trunk, and 22 mm SL  
260 there are clusters of 3-4 neuromasts, and by 38 mm SL there are clusters of 6 to 7 neuromasts on  
261 each scale long the midline. There is also a short line of neuromasts dorsal to the mid-line, *ld*, and  
262 another short line of neuromasts in the ventral region of the trunk, *lv*.

### 263 Caudal fin

264 The caudal region was examined in 3 individuals with DASPEI staining. On the caudal fin  
265 there are three longitudinal lines of neuromasts: there is a dorsal line, *lcd*, the medial line, *lcm* and  
266 the ventral line, *lcv*. Although no statistical analyses were conducted due to the limited number of  
267 individuals sampled the smallest fish examined, 11 mm SL had 8 neuromasts in the dorsal most  
268 *lcd* line, 11 neuromasts in the medial line, *lcm*, and 13 neuromasts in the ventral *lcv* line. By 35  
269 mm SL the number of neuromasts in these lines are 39, 42, 39 neuromasts respectively. There is a  
270 transverse *lct* line present on the caudal fin anterior to the three longitudinal lines.

### 271 **DISCUSSION:**

#### 272 Diversity in the adult morphology of lateral line system: Advantages

273 There are a wide range of lateral line system morphologies and specializations reported in  
274 fishes. Although there are lateral line system specializations that seem to be to associated with  
275 certain fish taxa, such as the lateral phisic connection in clupeids (Coombs *et al.*, 1988), there can  
276 also be a wide range of specialization in the lateral line system of closely related species within

277 the same family. These different lateral line morphologies can aid in ‘tuning’ the lateral line system  
278 depending on what frequencies are biologically relevant and how much hydrodynamic noise is in  
279 the environment (Janssen, 2003). Given that closely related species that live in different  
280 environmental conditions can have very different lateral line morphologies, it has been  
281 hypothesized that evolutionary origins of different lateral line morphologies could result from  
282 subtle changes during development of the lateral line system, such as the arrest of canal formation  
283 in species that lack a canal (Coombs *et al.*, 1988; Northcutt, 1997). Thus, identifying the  
284 similarities and differences in the development of the lateral line system may provide insight into  
285 the evolution of different lateral line morphologies.

286 Since different lateral line morphologies are thought to be specialized for picking up  
287 biologically relevant signals in a particular environment, it is not surprising that a closely related  
288 species within the same family that live in different habitats can have a wide range of lateral line  
289 morphologies. In gobies there tends to be a proliferation of superficial neuromasts, which have  
290 advantages and tradeoffs depending on the environments. While superficial neuromasts may be  
291 able to detect a broad range of signals, these signals include hydrodynamic signals from the  
292 environment and self-generated hydrodynamic signals that are created during swimming. If these  
293 fish inhabit hydrodynamically noisy environments where there is a lot of water flow, or they are  
294 highly mobile species, superficial neuromasts may not be able to detect other biological signals  
295 that are relevant. Thus, having a particular combination of both superficial neuromasts and canal  
296 neuromasts may be beneficial in certain environments but not others, which may be why there is  
297 such a diversity of lateral line system morphologies in gobies and other fishes.

298 Even if there is a proliferation of neuromasts there may be some advantage to retaining some  
299 canal segments. Superficial neuromasts can detect a broad range of hydrodynamic signals, whereas

300 neuromasts enclosed in lateral line canals can filter out the lower frequency environmental ‘noise’  
301 such as turbulence due to the mechanical properties of the canal (Janssen, 2003). Since there is  
302 more resistance to water movement because of the presence of the canal walls, there is less water  
303 movement in the canals at lower frequencies, which means the canals can act as high-pass filters  
304 to block out low frequency noise (Janssen, 2003). At higher frequencies there is less impedance in  
305 the canal and the boundary layers take longer to form, thus canals are better at detecting high  
306 frequency signals such as those generated by prey, when there is a lot of low frequency background  
307 noise in the environment (Janssen, 2003). This allows for fishes in environments with low  
308 frequency noise to detect higher frequency signals such as those generated by prey, thus fishes can  
309 have different combinations of superficial and canal neuromasts to detect signals in their  
310 environment.

311 Loss of canal segments and the proliferation of superficial neuromasts is common in gobiids  
312 as well as other fish taxonomic groups such as the sculpins of Lake Baikal. It is also a common  
313 adaptation for fishes that live in caves, such as the Mexican cavefish, as well as those that live in  
314 turbid waters such as pirate perch, *Aphredoderus sayanus*, and many deep-sea fishes. Even within  
315 a single taxonomic group there can be drastic modifications in the lateral line system. In the sculpin  
316 family Abyssocottidae of Lake Baikal there can be a complete absence of canal segments, that  
317 have been replaced with superficial neuromasts on papillae (Sideleva, 1982; Janssen, 2003). In  
318 other cases, the entire canal is not lost, but canal segments are missing, which has been documented  
319 in both sculpins and gobies. One example of this occurring in the sculpins is the Anadyr River  
320 form of *Cottus cognatus*, which is missing some of the canal segments that are present in the Lake  
321 Michigan population (Sideleva, 1982). The presence or absence of different canal segments within  
322 the same species present in different environments also occurs in Gobiids. The Tidewater goby,

323 *Eucyclogobius newberryi*, has latitudinal variation in the supraorbital canal morphology with the  
324 northern populations with the full lateral line canal system while the southern population has more  
325 reduced canals were segments are actually missing (Ahnelt *et al.*, 2004). Given this information it  
326 is likely that canal loss and proliferation of superficial neuromasts present in the adult  
327 morphologies could be the result of changes or modifications that occur during development.

### 328 Canal diversity in gobies

329 In gobies it is common for neuromast proliferation of superficial neuromasts to occur in places  
330 where canal segments or entire canals are missing, thus there seems to be a relationship between  
331 canal segment loss and neuromast proliferation. The loss of canal segments or entire canals is so  
332 common among different species of gobies and can be used as a character for taxonomic  
333 classification. In fact, characteristics of the oculoscapular (which can also be referred to as the  
334 supraorbital and otic canals) canal have been used to propose that subfamily Gobiinae is  
335 monophyletic (Pezold 2007). Canal segment loss and the proliferation of neuromasts has also been  
336 noted in the goby literature. Miller indicated that members of the family Gobiidae tend to lack a  
337 developed canal in the suborbital (also called the infraorbital canal) and supratemporal regions and  
338 have numerous superficial neuromasts (sensory papillae).

339 This reduction in lateral line canals and segments that is present in the Round Goby is  
340 consistent with other members of the family Gobiidae and subfamily Gobiinae. The Round goby  
341 completely lacks the infraorbital canal under the eye, and in other canals there are missing canal  
342 segments. Like many other members of the subfamily Gobiinae, the first pore (A) and the first  
343 canal segment in the oculoscapular canal is absent, and there appears to be a shared pore for pores  
344 C and D. Unlike other members of subfamily Gobiinae, the Round Goby retains the N-O segment  
345 in the preopercular region (Cooper *et al.*, 2007). Since we know that development of canal



346 segments can be asynchronous in other species (Tarby and Webb, 2003; Bird and Webb, 2014;  
347 Webb *et al.*, 2014), it is possible that temporal changes during canal development in gobies can  
348 lead to the loss of canal segments.

349 At least some of the canals in the round goby appear to complete all the stages of canal  
350 development described in by others (Northcutt, 1997; Tarby and Webb, 2003; Webb and Shirey,  
351 2003). In the round goby, it appears that some of the primary neuromasts are present in the smallest  
352 individual examined 4.5 mm SL. As with other fishes, the development of the canal segments  
353 seems to be asynchronous, which later fuse leaving a pore between segments. In the round goby  
354 there is one neuromast per canal segment which is typical of Actinopterygians and a few  
355 Sarcopterygians such as *Neoceratodus* and *Latimeria* (Webb and Northcutt, 1997). Understanding  
356 the lateral line system development may not only provide insight into potential mechanisms for  
357 how the intricate patterns of superficial neuromasts could have evolved among different gobiid  
358 species, it could also enhance our understanding of how variations in lateral line canal  
359 morphologies convergently evolved many times in numerous fish families. Perhaps there are subtle  
360 changes in the timing of development that can lead to the different lateral line canal morphologies  
361 observed in adult fishes.

### 362 Variations in superficial neuromasts:

363 In gobies canal loss along the head and trunk is often accompanied by the presence of  
364 superficial neuromast proliferation in the location where the canal would be present. This is the  
365 most prominent in the in the anterior lateral line system. Since superficial neuromasts on the head  
366 are the most sensitive, because the boundary layer is the thinnest due to the negative pressure  
367 gradient (Janssen, 2003; Windsor and McHenry, 2009), an increase in the number of superficial  
368 neuromasts may be beneficial in certain habitats. The most striking example of neuromast

369 proliferation in the Round Goby is in the suborbital region below the eye, which can be arranged  
370 in different patterns.

371 These patterns of superficial neuromasts can range from the more ordered rows and lines, to  
372 merely aggregations on the head (Ahnelt and Bohacek, 2004). There are two common  
373 arrangements of superficial neuromasts in the infraorbital region. Some gobies have the  
374 ‘transverse’ pattern (vertical or orthogonal lines of superficial neuromasts), while others have the  
375 longitudinal (horizontal) lines of neuromasts (Korn and Bennett, 1975). In general *N.*  
376 *melanostomus* seems to have the transverse pattern of neuromasts in the infraorbital regions similar  
377 to the rock goby *Gobius paganellus* (Ahnelt 2001).

378 There is also canal loss accompanied with superficial neuromast proliferation in the dorsal  
379 view of the goby. There is no supratemporal canal, however there are larger neuromasts that  
380 proliferate and form lines *g* and *m*. The supraorbital canal is present above the eyes and along the  
381 anterior edges of the neurocranium. There are also superficial neuromasts that seem to continue  
382 along the lateral edges of the neurocranium in the posterior region of the neurocranium where the  
383 supraorbital canal is no longer present.

384 In the family Gobiidae the body does not have a trunk lateral line canal or modified scales,  
385 there are only exposed superficial neuromasts on the trunk. The most common pattern of  
386 superficial neuromasts on the caudal fin is three longitudinal rows (Ahnelt and Duchkowitsch,  
387 2001). This plesiomorphic caudal neuromast pattern is present on the caudal region of the Round  
388 Goby and is similar to that of *Gobius niger*, unlike the more derived patterns with 4-8 longitudinal  
389 lines of neuromasts found in deep water gobies such as *Deltentosteus quadrimaculatus*,  
390 *Deltentosteus collonianus*, and *Aphia minuta* (Ahnelt and Duchkowitsch, 2001). Although all these  
391 lines of superficial neuromast were labeled according to the literature and followed throughout

392 development, these names still need to be confirmed by looking at the innervation (Kornis *et al.*,  
393 2012).

394 The pattern of the superficial neuromasts has been successfully used as a major characteristic  
395 for identifying individual species in the field (Pennuto *et al.*; Albert I, 1965). This is useful since  
396 the pattern of superficial neuromasts in adults does not change, whereas other features such as  
397 coloration may be more variable and fade in preserved specimens. The lateral line system seems  
398 to be a good diagnostic characteristic for identifying adults, (Toshiaki J, 1971) but it maybe a less  
399 than reliable characteristic for identifying larvae. Although these patterns have been documented  
400 in detail in adults, this is the first study to describe the ontogeny of the superficial neuromasts  
401 patterns throughout development.

#### 402 *Superficial neuromasts throughout ontogeny*

403 We found that a few superficial neuromasts in the round goby are indeed present at hatching  
404 (~ 4.5-6 mm SL), however the intricate patterns of superficial neuromasts that are found in adults  
405 are not present at hatching. The longitudinal lines in the infraorbital region have several neuromast  
406 early in development, while the transverse lines only contain a single neuromast that do not begin  
407 proliferating till about 10-12 mm SL. The number of superficial neuromast in many of the  
408 superficial neuromast lines seems to still be increasing in largest fish, 74 mm SL fish. These  
409 findings are consistent with what is known about the development of the more well studied  
410 posterior lateral lines system in fishes; the early development is very simplified and increases in  
411 complexity later (Pichon and Ghysen, 2004).

#### 412 *Development and evolution of superficial neuromasts*

413 Similar to other fishes (Jones and Janssen, 1992; Northcutt, 1997; Tarby and Webb, 2003), it  
414 seems that the superficial neuromasts are ontogenetic precursors of all canal neuromasts in the

415 Round Goby (Webb and Northcutt, 1997). If this is the case, presumptive canal neuromasts that  
416 are stranded, could exhibit the properties of superficial neuromasts, such as neuromast  
417 proliferation to form ‘stiches’ which is present in the round goby.

418 There are a number of superficial neuromasts that could be potential canal neuromast  
419 homologues, which result from changes in the timing of canal development (i.e. canal development  
420 is halted before the neuromasts completely enclose in canals or before the canal begins to form).  
421 We hypothesize that the developmental origins of these single neuromasts in the suborbital region  
422 are actually presumptive infraorbital canal neuromasts that are stranded due to the lack of canal  
423 formation (Figs 3). We further hypothesize that once these canal neuromasts are stranded they can  
424 begin to exhibit the proliferation behavior observed in superficial neuromasts, which leads to the  
425 formation of the transverse lines of superficial neuromasts present in the suborbital region of adult  
426 Round Gobies.

427 There is further evidence that some of these superficial neuromasts are actually canal  
428 homologues. The three major lines of evidence that some of the superficial neuromasts originated  
429 from stranded canal neuromasts are 1) in some cases there is still the presence of a groove,  
430 indicating canal development was arrested before the canals were completely enclosed and thus  
431 by definition are superficial neuromasts, 2) the timing of the first appearance of the parent  
432 neuromasts that will give rise to these lines of superficial neuromasts, 3) the size of the neuromast  
433 when it first arises relative to other canal neuromasts. The mandibular and anterior portion of the  
434 preopercular canal of the Round Goby have all three of these characteristics. There are also  
435 neuromasts that seem to have a different ontogenetic origin. These ‘neomorphic’ neuromasts tend  
436 to arise later in development and are smaller in size relative to the canal neuromasts.

437 Not all of the stranded canal neuromasts show signs of any canal formation, however, they  
438 show the same developmental pattern of large primary neuromasts that appear at the same time as  
439 canal neuromasts and then later undergo proliferating by budding, forming lines with secondary  
440 neuromasts. Some of the neuromasts in the otic regions (line *u*) may be an example of canal  
441 neuromasts that are proliferating. There may also be stranded canal neuromasts in the dorsal region  
442 of the Round goby. In many fishes there is a supratemporal commissure that connects the two main  
443 body canals (Coombs et al., 1988). Although this canal is not present in the Round goby there are  
444 single primary neuromasts in the region that are present at 9 mm SL that could be homologous to  
445 the primary neuromasts. These neuromasts then proliferate and give rise to the lines *m* and *g* (Fig.  
446 6). Most superficial neuromasts are either accessory lines or replacement lines for canals lost in  
447 evolution (Coombs et al., 1988).

#### 448 Neomorphic lines

449 Neomorphic lines of superficial neuromasts are accessory or independent of existing canals  
450 (Lekander, 1949; Disler, 1960). It is possible that other mechanisms may have formed these lines.  
451 There is no clear link to canal neuromasts in that area. Some of the otic lines (*x*, *la*) and opercular  
452 lines (*ot*, *oi*, *os*) suborbital (infraorbital region) the longitudinal lines *d*, *b* in the suborbital  
453 (infraorbital) region are neomorphic. In zebrafish, it has been shown that neural induction is  
454 involved in stich formation (Wada *et al.*, 2013a; Wada *et al.*, 2013b).

455 In the future, the mechanisms for neuromast proliferation in the gobies should be investigated  
456 in more detail. Although the mechanisms for neuromasts development and proliferation have been  
457 known to vary in posterior lateral line development across fish taxa (Pichon and Ghysen, 2004),  
458 neuromast proliferation and development have never been compared in closely related species  
459 such as gobies with diverse patterns of superficial neuromasts. It is thought that variation in the

460 lateral line system is due to environmental and phylogenetic differences. Perhaps the diverse lateral  
461 line patterns found in gobies are the result of both their phylogenetic history and adaptations to the  
462 many diverse environments that gobies inhabit.

463 In fishes, it appears that there are potentially several sources from which the lines of superficial  
464 neuromasts could originate. Neuromasts can ‘bud’ from existing neuromasts from the primary  
465 neuromasts which has been described in the anterior lateral line system (Zipser and Bennett, 1973;  
466 Harding et al., 1981; Stone, 1933; Stone, 1937; Northcutt et al., 1994; Jones and Corwin, 1996;  
467 Mackenzie, 2012) or neomorphic lines can result from neural induction. In the Round Goby it  
468 appears that the ‘budding’ of presumptive canal neuromasts (primary neuromasts) could be a  
469 possible developmental origin for some of the transverse (orthogonal) lines of superficial  
470 neuromasts, particularly in the suborbital region below the eye. Thus, understanding lateral line  
471 development may be important for determining how diverse and complex lateral line patterns of  
472 superficial neuromasts arise from very simplified lateral line patterns in larval fishes.

473 This study shows that many of the intricate lines of neuromasts present in adults are not present  
474 or are greatly simplified in early larvae which is similar to other fishes (Pichon and Ghysen, 2004).  
475 The Round goby showed dramatic increases in the number of neuromasts present during the larval  
476 period (Fig. 2-6) and the patterns of superficial neuromasts change throughout development. This  
477 means that the lateral line system may not be a good diagnostic characteristic for differentiating  
478 an individual species of goby larvae from other species of goby larvae. It is possible that at hatching  
479 many species of gobies that have completely different patterns of superficial neuromasts as adults  
480 have very similar patterns of superficial neuromasts as larvae. Changes in the number of superficial  
481 neuromasts during development have taxonomical, ecological, and evolutionary implications.

482

## 483 ACKNOWLEDGEMENTS:

484 I would like to thank the members of the Udvardia and Janssen labs at the University of Wisconsin-  
485 Milwaukee for their help with collecting and maintaining fish in the laboratory. I would also like  
486 to thank Drs. Udvardia and Svoboda for the use of their microscopes, supplies, and many fruitful  
487 discussions on imaging and fish development. We would also like to thank H.A. Owen for help  
488 with the SEM preparation. This project was funded by a *Grant-In-Aid of Research from the*  
489 *National Academy of Sciences, administered by Sigma Xi, The Scientific Research Society*. This  
490 animal care protocol for this project (11-12 #2) was approved Institutional Animal Care and Use  
491 Committee at the University of Wisconsin-Milwaukee.

## 492 CONTRIBUTIONS:

493 The intellectual foundations of this project, i.e. reduced lateral line canal development was from J.A.  
494 Janssen. Fish were collected and housed by J.A. Janssen. Microscopy, data collection, and statistical  
495 analyses were conducted by J.M. Dickson. Manuscript draft preparation was done by J.M. Dickson while  
496 J.A. Janssen assisted in manuscript edits and intellectual guidance.

## 497 REFERENCES:

498 Ahnelt, H., Abdoli, A., Naderi, M. & Coad, B. W. (2000). Anatirostrum profundorum: A rare deep-water  
499 gobiid species from the Caspian Sea. *Cybium* **24**, 139-159.  
500 Ahnelt, H. & Bohacek, V. (2004). The lateral line system of two sympatric eastern Pacific gobiid fishes of  
501 the genus *Lythrypnus* (Teleostei : Gobiidae). *Bulletin of Marine Science* **74**, 31-51.  
502 Ahnelt, H. & Duchkowitsch, M. (2001). The lateral line system of two Ponto-Caspian gobiid species  
503 (Gobiidae, Teleostei): a comparison. *Folia Zoologica* **50**, 217-230.  
504 Ahnelt, H. & Goschl, J. (2003). Morphological differences between the eastern Pacific gobiid fishes  
505 *Quietula guaymasiae* and *Quietula y-cauda* (Teleostei : Gobiidae) with emphasis on the topography of the  
506 lateral line system. *Cybium* **27**, 185-197.  
507 Ahnelt, H., Goschl, J., Dawson, M. N. & Jacobs, D. K. (2004). Geographical variation in the cephalic lateral  
508 line canals of *Eucyclogobius newberryi* (Teleostei, Gobiidae) and its comparison with molecular  
509 phylogeography. *Folia Zoologica* **53**, 385-398.  
510 Akihito, P. (1986). Some morphological characters considered to be important in gobiid phylogeny. In  
511 *Indo-Pacific fish biology: Proceedings of the second international conference on Indo-Pacific fishes*. (Uyeno,  
512 T., Arai, R., Taniuchi, T. & Matsuura, K., eds.), pp. 629-639. Tokyo: Ichthyolog. Soc. Japan.  
513 Albert I, F. (1965). Fine structure of the taste bud. *Journal of Ultrastructure Research* **12**, 328-350.

- 514 Bertucci, F., Attia, J., Beauchaud, M. & Mathevon, N. (2012). Sounds produced by the cichlid fish  
515 *Metriacrima zebra* allow reliable estimation of size and provide information on individual identity. *Journal*  
516 *of Fish Biology*, no-no.
- 517 Bird, N. C. & Webb, J. F. (2014). Heterochrony, modularity, and the functional evolution of the  
518 mechanosensory lateral line canal system of fishes. *EvoDevo* **5**, 21.
- 519 Braun, C. B. & Northcutt, R. G. (1997). The Lateral Line system of Hagfishes (Craniata:Myxinoidea). *Acta*  
520 *Zoologica* **78**, 247-268.
- 521 Coombs, S., Janssen, J. & Webb, J. F. (1988). Diversity of the lateral line systems: phylogenetic and  
522 functional considerations. In *Sensory Biology of Aquatic Animals* (Atema, J., Fay, R. R., Popper, A. N. &  
523 Tavalga, W. N., eds.), pp. 552-593. New York: Springer.
- 524 Cooper, M. J., Ruetz Iii, C. R., Uzarski, D. G. & Burton, T. M. (2007). Distribution of Round Gobies in Coastal  
525 Areas of Lake Michigan: Are Wetlands Resistant to Invasion? *Journal of Great Lakes Research* **33**, 303-313.
- 526 Denton, E. & Gray, J. (1988). Mechanical factors in the excitation of the lateral line of fishes. In *Sensory*  
527 *Biology of Aquatic Animals* (Atema, J., Fay, R. R., Popper, A. N. & Tavalga, W. N., eds.), pp. 663-678. New  
528 York: Springer.
- 529 Disler, N. N. (1960). Lateral Line Sense Organs and their Importance in Fish Behavior. In *Acad. Sci. USSR,*  
530 *Severtsov Inst. Anim. Morph. 1960/ Israel Prog. for Scie. Trans., Jerusalem, 1971.*
- 531 Fuiman, L., Higgs, D. & Poling, K. R. (2004). Changing structure and function of the ear and lateral line  
532 system of fishes during development. *American Fisheries Society Symposium* **40**, 117-144.
- 533 Hall, B. K. (1999). *Evolutionary Developmental Biology*. Dordrecht: Kluwer Academic Publishers.
- 534 Helfman, G. S., Collette, B. B. & Facey, D. E. (1997). *The Diversity of Fishes*. Oxford: Blackwell Publishing.
- 535 Iljin, B. S. (1930). Le systeme de Gobiides. In *Trab. Inst. Esp. Oceanogr.*, pp. 1-63. Madrid.
- 536 Janssen, J. (2003). Lateral line sensory ecology. In *The senses of fishes: adaptations for the reception of*  
537 *natural stimuli* (Von der Emde, G., Mogdans, J. & Kapoor, B. G., eds.), pp. 231-264. New Delhi: Narosa  
538 Publishing House Pvt. Ltd.
- 539 Janssen, J., Coombs, S., Hoekstra, D. & Platt, C. (1987). ANATOMY AND DIFFERENTIAL GROWTH OF THE  
540 LATERAL LINE SYSTEM OF THE MOTTLED SCULPIN, COTTUS-BAIRDI (SCORPAENIFORMES, COTTIDAE).  
541 *Brain Behavior and Evolution* **30**, 210-229.
- 542 Jones, W. R. & Janssen, J. (1992). LATERAL LINE DEVELOPMENT AND FEEDING-BEHAVIOR IN THE MOTTLED  
543 SCULPIN, COTTUS-BAIRDI (SCORPAENIFORMES, COTTIDAE). *Copeia*, 485-492.
- 544 Korn, H. & Bennett, M. V. (1975). Vestibular nystagmus and teleost oculomotor neurons: functions of  
545 electrotonic coupling and dendritic impulse initiation. *Journal of Neurophysiology* **38**, 430-451.
- 546 Kornis, M. S., Mercado-Silva, N. & Vander Zanden, M. J. (2012). Twenty years of invasion: a review of  
547 round goby *Neogobius melanostomus* biology, spread and ecological implications. *Journal of Fish Biology*  
548 **80**, 235-285.
- 549 Langkau, M. C., Balk, H., Schmidt, M. B. & Borchering, J. (2012). Can acoustic shadows identify fish  
550 species? A novel application of imaging sonar data. *Fisheries Management and Ecology*, no-no.
- 551 Lannoo, M. J. (1987a). Neuromast topography in anuran amphibians. *Journal of Morphology* **191**, 115-  
552 129.
- 553 Lannoo, M. J. (1987b). Neuromast topography in urodele amphibians. *Journal of Morphology* **191**, 247-  
554 263.
- 555 Lekander, B. (1949). The sensory line system and the canal bones in the head of some Ostariophysi. *Acta.*  
556 *Zool.* **30**, 1-131.
- 557 Long, M., Betran, E., Thornton, K. & Wang, W. (2003). The origin of new genes: glimpses from the young  
558 and old. *Nat Rev Genet* **4**, 865-875.
- 559 Maruska, K. P. & Tricas, T. C. (2004). Test of the mechanotactile hypothesis: neuromast morphology and  
560 response dynamics of mechanosensory lateral line primary afferents in the stingray. *Journal of*  
561 *Experimental Biology* **207**, 3463-3476.



- 562 Miller, P. J. (1986). Gobiidae. In *Fishes of the northeastern Atlantic and the Mediterranean* (Whitehead, P.  
563 J. P., Bauchot, M. L., Hureau, J. C., Nielsen, J. & Tortonese, E., eds.), pp. 1019-1085. Paris: UNESCO.
- 564 Northcutt, R. G. (1997). Evolution of Gnathostome Lateral Line Ontogenies. *Brain Behavior and Evolution*  
565 **50**, 25-37.
- 566 Pennuto, C. M., Howell, T. E. & Makarewicz, J. C. Relationships among round gobies, Dreissena mussels,  
567 and benthic algae in the south nearshore of Lake Ontario. *Journal of Great Lakes Research*.
- 568 Peters, H. M. (1973). Anatomie und Entwicklungsgeschichte des Lateralisystems von *Tilapia* (Pisces,  
569 Cichlidae). *Z. Morphol. Tiere* **74**, 89-161.
- 570 Pezold, F. (1993). Evidence for a monophyletic Gobiinae. *Copeia* **3**, 634-645.
- 571 Pichon, F. & Ghysen, A. (2004). Evolution of posterior lateral line development in fish and amphibians.  
572 *Evolution and Development* **6**, 187-193.
- 573 Puzdrowski, R. (1989). The peripheral distribution and central projections of the lateral line nerves in  
574 goldfish, *Crassius auratus*. *Brain Behavior and Evolution* **37**, 10-37.
- 575 Sanzo, L. (1911). Distribuzione delle papille cutanee (organi ciatiformi) e suo valore sistematico nei gobi.  
576 *Mitt. Zool. Stat. Neapel* **20**, 249-328.
- 577 Sato, M. (1955). On the development of the neuromasts of the carp *Cyprinus carpio*. *Jap. J. Ichthyol.* **4**,  
578 105-112.
- 579 Sideleva, V. (1982). The lateral-line system and ecology of the Baikal sculpins (Cottoidei). *Novosibirsk:*  
580 *Izdatel'stvo Nauka (in Russian)*.
- 581 Tarby, M. L. & Webb, J. F. (2003). Development of the supraorbital and mandibular lateral line canals in  
582 the cichlid, *Archocentrus nigrofasciatus*. *Journal of Morphology* **255**, 44-57.
- 583 Toshiaki J, H. (1971). Chemoreception. In *Fish Physiology* (Hoar, W. S. & Randall, D. J., eds.), pp. 79-120:  
584 Academic Press.
- 585 Wada, H., Dambly-Chaudiere, C., Kawakami, K. & Ghysen, A. (2013a). Innervation is Required for Sense  
586 Organ Development in the Lateral Line System of Adult Zebrafish. *PNAS* **110**, 5659-5664.
- 587 Wada, H., Ghysen, A., Asakawa, K., Abe, G., Ishitani, T. & Kawakami, K. (2013b). Wnt/Dkk Negative  
588 Feedback Regulates Sensory Organ Size in Zebrafish. *Current Biology* **23**, 1559-1565.
- 589 Webb, J., Bird, N., Carter, L. & Dickson, J. (2014). Comparative Development and Evolution of Two Lateral  
590 Line Phenotypes in Lake Malawi Cichlids. *Journal of Morphology* **275**, 678-692.
- 591 Webb, J. F. (1989). Gross morphology and evolution of the mechanoreceptive lateral-line system in  
592 teleost fishes. *Brain Behavior and Evolution* **33**, 34-53.
- 593 Webb, J. F. & Northcutt, R. G. (1997). Morphology and distribution of pit organs and canal neuromasts in  
594 non-teleost bony fishes. *Brain Behavior and Evolution* **50**, 139-151.
- 595 Webb, J. F. & Shirey, J. E. (2003). Postembryonic development of the cranial lateral line canals and  
596 neuromasts in zebrafish. *Developmental Dynamics* **228**, 370-385.
- 597 Windsor, S. P. & McHenry, M. J. (2009). The influence of viscous hydrodynamics on the fish lateral-line  
598 system. *Integrative and Comparative Biology* **49**, 691-701.
- 599 Yamada, Y. (1973). Fine structure of the ordinary lateral line organ: I. The neuromast of lamprey,  
600 *Entosphenus japonicus*. *Journal of Ultrastructure Research* **43**, 1-17.

601

## 602 FIGURES

603

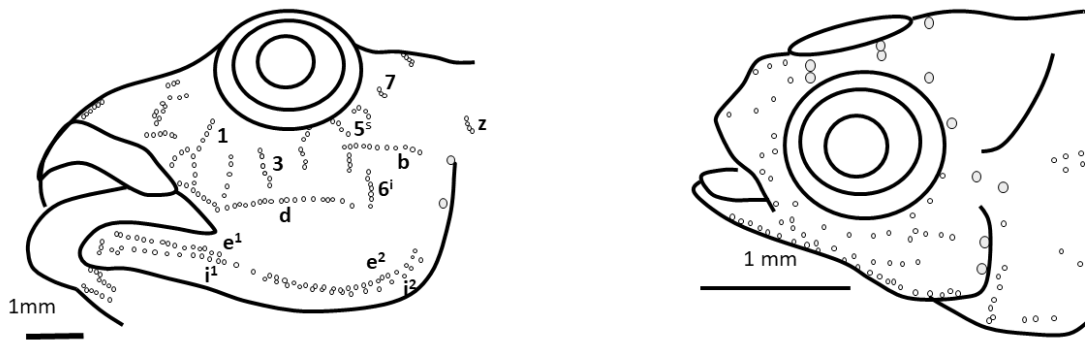

604

605 **Fig. 1. Diagram of neuromast position in Round goby, *Neogobius melanostomus*, at A) 30 mm**

606 **SL and B) 9 mm SL. Small open circles indicate superficial neuromasts and larger open**

607 **circles are canal neuromasts.**

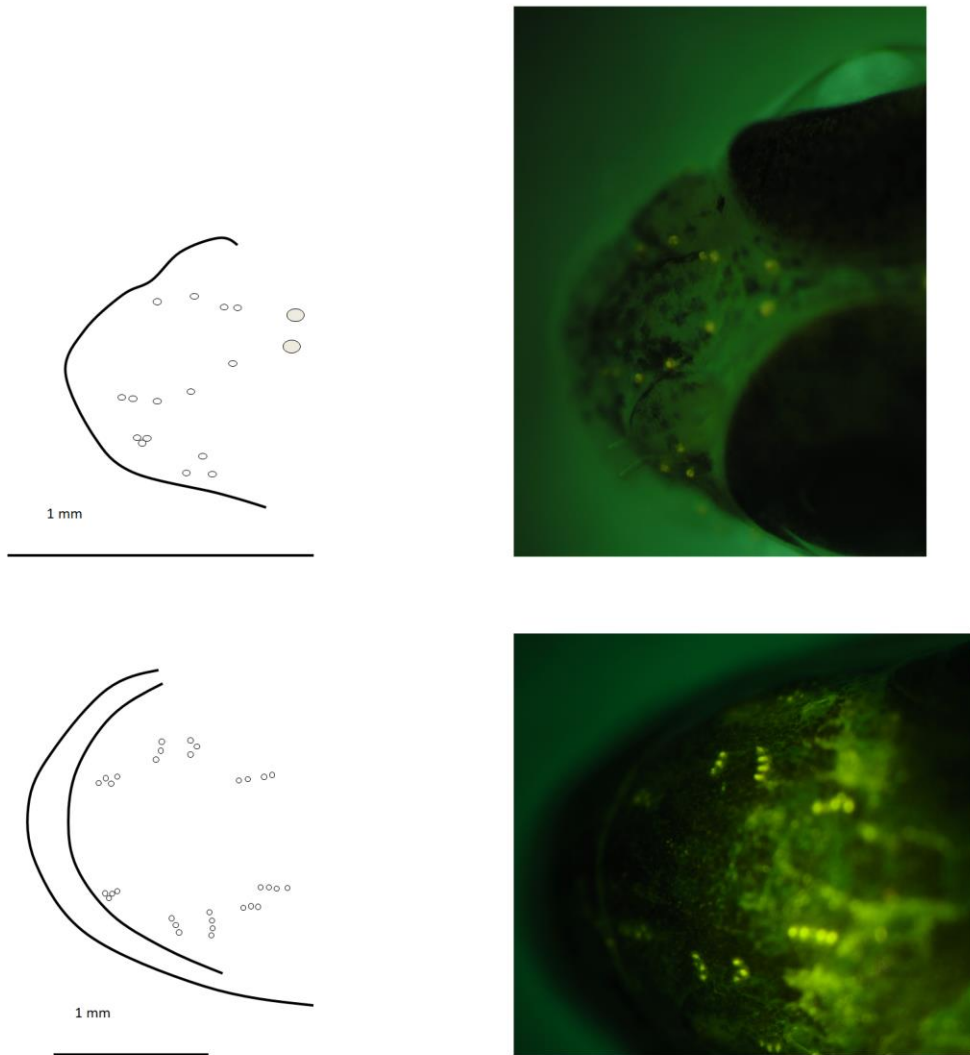

608

609 **Fig. 2. Dorsal view of Round Goby, *N. melanostomus*, heads throughout development at A)**

610 **12 mm SL, B) 30 mm SL. Neuromasts are fluorescently stained with DASPEI. Small open**

611 **circles indicate superficial neuromasts and larger open circles are canal neuromasts.**

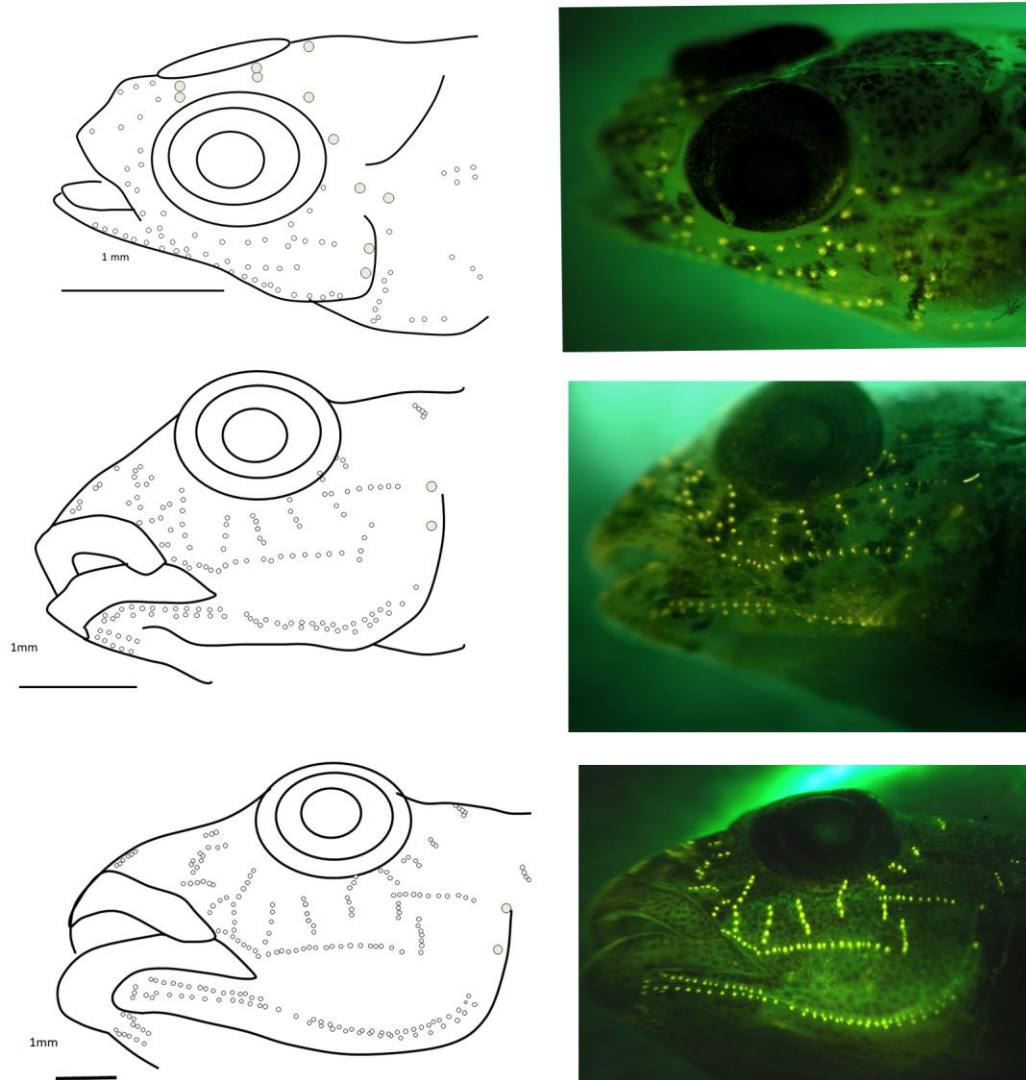

612

613 **Fig. 3. Lateral view of Round Goby, *N. melanostomus*, heads at different sizes during**  
614 **development. (File DSCN0909 A) is 9 mm SL, B) 16.5 mm SL(File DSCN1345) C) 30 mm**  
615 **SL. Neuromasts are fluorescently stained with DASPEI. Small open circles indicate**  
616 **superficial neuromasts and larger open circles are canal neuromasts.**

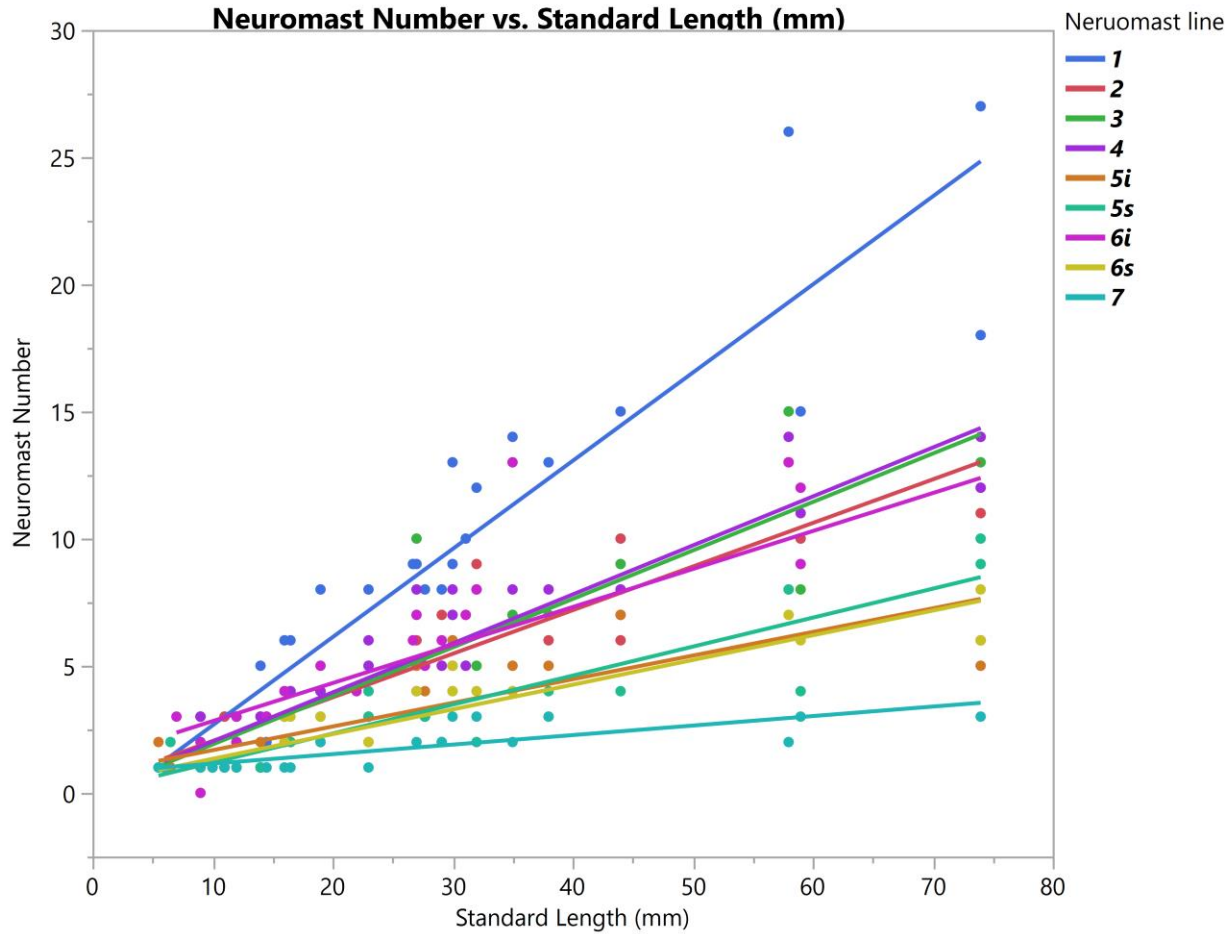

617

618 **Fig. 4.** Number of superficial neuromasts in A) infraorbital region in superficial neuromast  
619 lines 1 (blue filled circles), 2 (red filled circles), 3 (light green filled circles), 4 (purple filled  
620 circles), 5s (orange filled circles), 5i (dark green circles), 6s (gold filled circles), 6i (magenta  
621 filled circles), and 7 (light blue filled circles).

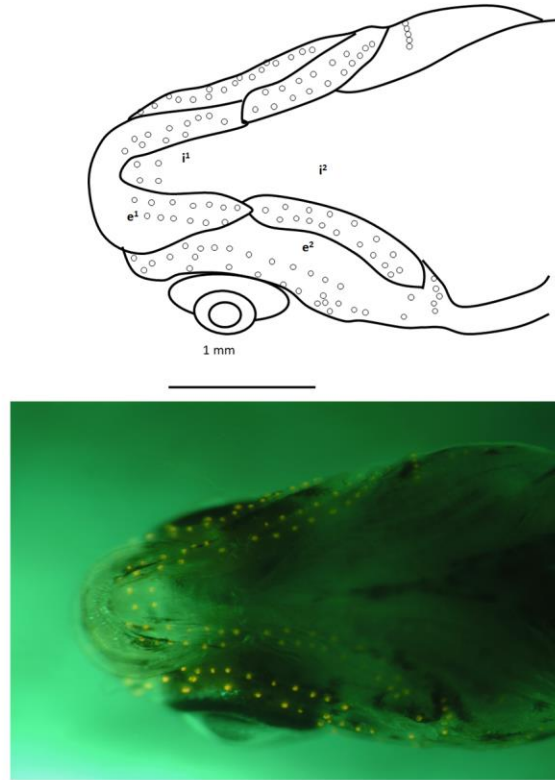

622

623 **Fig. 5. A) Ventral view of Round goby, *N. melanostomus*, at 9 mm SL. Neuromasts are**  
624 **fluorescently stained with DASPEI. Small open circles indicate superficial neuromasts and**  
625 **larger open circles are canal neuromasts**

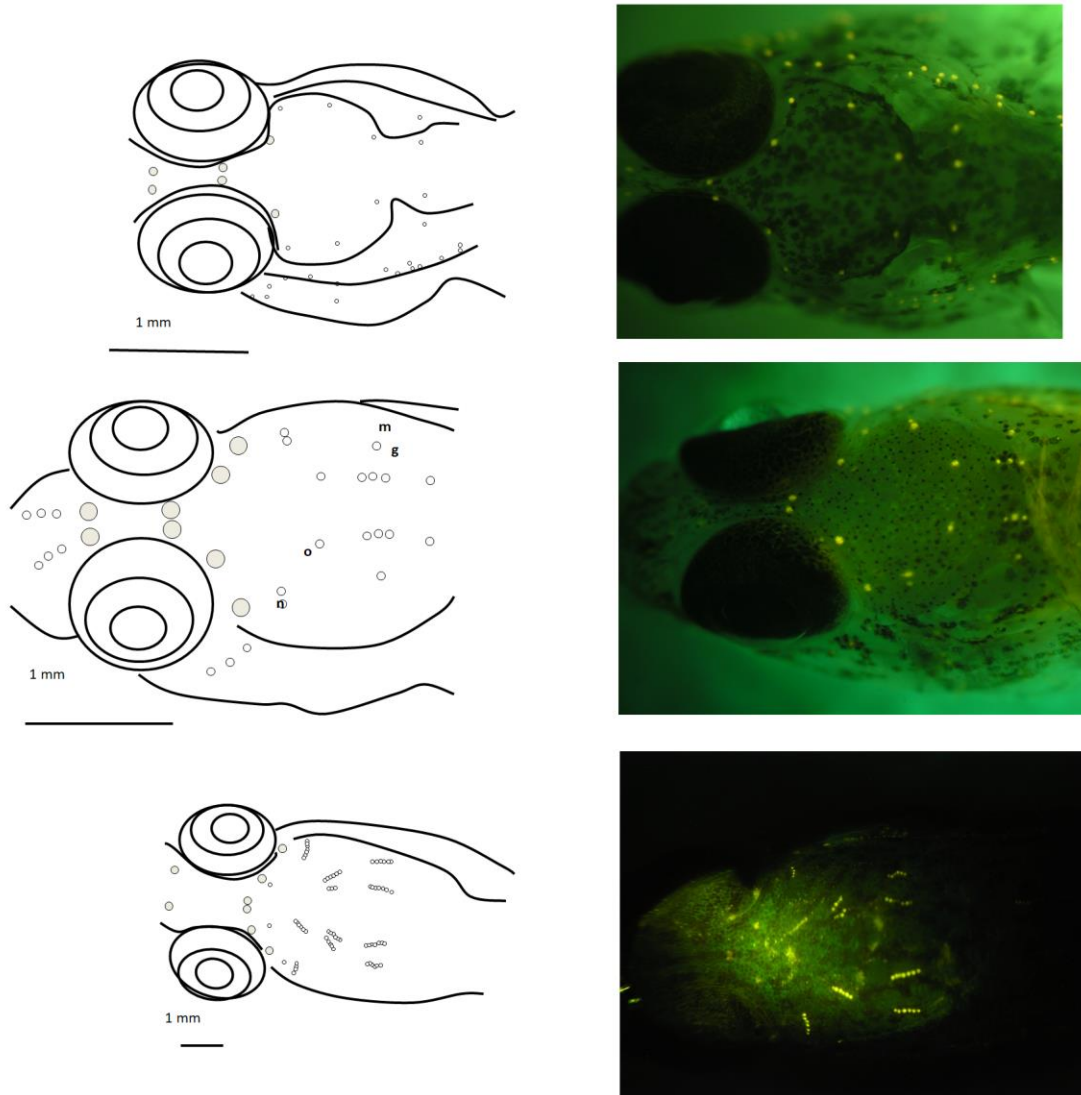

626

627 **Fig. 6. Dorsal view of Round Goby, *N. melanostomus*, heads throughout development. A) 9**  
628 **mm SL, B) 12 mm SL C) 35 mm SL. Neuromasts are fluorescently stained with DASPEI.**  
629 **Small open circles indicate superficial neuromasts and larger open circles are canal**  
630 **neuromasts.**

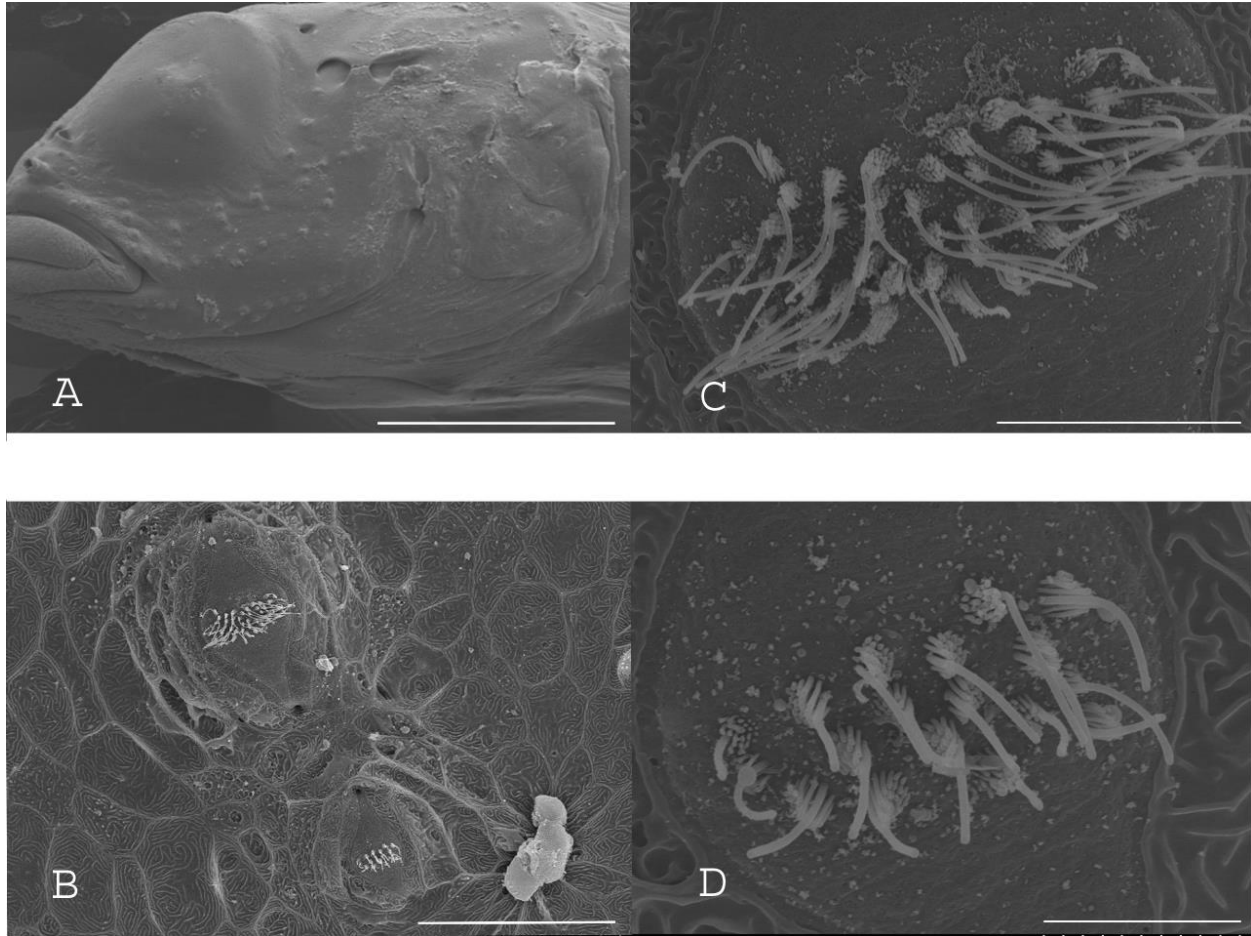

631

632 **Fig. 7. SEM micrograms of the superficial lines ventral to the eye in a 12 mm SL Round**  
633 **Goby, *N. melanostomus*. A) Lateral view of head taken at magnification of x45, B)**  
634 **proliferating neuromasts in the superficial lines of neuromasts below the eye at x800**  
635 **magnification. C) The larger more dorsal neuromast pictured in ‘B’ at a higher**  
636 **magnification of x5000 and D) the smaller ventral neuromast pictured in ‘B’ magnified by**  
637 **x8000.**

638

639

640



641

642 **Appendices:**

643

644 **Author addresses:**

645 <sup>1</sup> Department of Biological Sciences, University of Wisconsin-Milwaukee, 3209 N. Maryland Ave,  
646 Milwaukee, WI, 53201; E-mail: [jdickson@uwm.edu](mailto:jdickson@uwm.edu).

647 <sup>2</sup> School of Freshwater Sciences, University of Wisconsin-Milwaukee, 600 East Greenfield Ave,  
648 Milwaukee, WI, 53204; E-mail: [jjanssen@uwm.edu](mailto:jjanssen@uwm.edu).

649

650

651

652
